# Supplementary material
Source: PubMed Central journal article supplement (PMC3293525)
Supplement: supp_M111.299438_jbc.M111.299438-1.pdf [file supp_M111.299438_jbc.M111.299438-1.pdf]

## SUPPLEMENTARY INFORMATION

**Supplemental Table 1: List of primers used in this study**

| Primer Name           | Sequence                                                      |
|-----------------------|---------------------------------------------------------------|
| <b>DhPPZ1 cloning</b> |                                                               |
| DhPPZ1_ORF F          | 5'-CTAGCTAGCATGGGGAACAATTCATCTAAG-3'                          |
| DhPPZ1_ORF R          | 5'-CCGCTCGAGTTACAGCTGTTGCAACTGAG-3'                           |
| DhPPZ1_Full F         | 5'-CGGGATCCTTTATCCTACACGTCCTAAC-3'                            |
| DhPPZ1_Full R         | 5'-CCGCTCGAGTAACAGATTCTAATAAGGGC-3'                           |
| DhPPZ1_ORF new RFP F  | 5'-TATACCATGGATGGGGAACAATTCATCTAA-3'                          |
| DhPPZ1_ORF RFP R      | 5'-CCGCTCGAGCAGCTGTTGCAACTGAGC-3'                             |
| <b>DhPPZ1 mutants</b> |                                                               |
| DhPPZ1_seq1           | 5'-AGAAATGATTAACACTTGGAC-3'                                   |
| DPPZ1_flanking F      | 5'-TTTCTACGAACGCTCACG-3'                                      |
| DhPPZ1_DEL1 F         | 5'-CTCGGCAAAGATGCTGAGGGATGATAATTCA-3'                         |
| DhPPZ1_DEL1 R         | 5'-CCCTCAGCATCTTTGCCGAGTTTCCCG-3'                             |
| DhPPZ1_DEL2 F         | 5'-TTCACGCAAGATACCGATTAACGGGAATAAC-3'                         |
| DhPPZ1_DEL2 R         | 5'-TAATCGGTATCTTGCGTGAAGTAGCCTTC-3'                           |
| DhPPZ1_DEL3 F         | 5'-GATTAACGGGAAAAATCCATCAAATCAGCAT-3'                         |
| DhPPZ1_DEL3 R         | 5'-ATGGATTTTTCCCGTTAATCGGTATGTTC-3'                           |
| DhPPZ1_DEL4F          | 5'-CTTACATAAATCAATGATACAAGTGGAACCTAA-3'                       |
| DhPPZ1_DEL4R          | 5'-GTATCATTGATTTATGTAAGCTTAGGTTGAAA-3'                        |
| DhPPZ1_DEL5F          | 5'-TCATTTGGCACATTCACATCATTCTGGAAGTAT-3'                       |
| DhPPZ1_DEL5R          | 5'-GATGTGAATGTGCCAAATGAGGTGAATTC-3'                           |
| DhPPZ1_DEL6 F         | 5'-CCTACTGCATATTGATATTGAAAACCTTGATTCAG-3'                     |
| DhPPZ1_DEL6 R         | 5'-CAATATCAATATGCAGTAGGTTATTAATCAGTACAT-3'                    |
| DhPPZ1_F NEW          | 5'-AAGGATCCTTTATCCTACACGTCCTAACATTA-3'                        |
| DhPPZ1_R NEW          | 5'-AATAGAGCTCTAACAGATTCTAATAAGGGCTCG-3'                       |
| DhPPZ1_int R1         | 5'-TATACCATGGTCTCCTAGTTTTAAACTACCAACG-3'                      |
| DhPPZ1_int F1         | 5'-AATACCATGGGGAACAATTCATCTAAG-3'                             |
| DhPPZ1_int R2         | 5'-CATATGTACATCGCCAACCACTTTAACAG-3'                           |
| DhPPZ1_NterR          | 5'-TATCTCGAGTTAGTGATGATGATGATGATGATGAGAGCCGC<br>TATCGTCG-3'   |
| DhPPZ1_Cter F         | 5'-TTAACCATGGATGATTGATATTGAAAACCTTGATTCA-3'                   |
| DhPPZ1_303R           | 5'-TATAAGCTTAGGTTGAAAACGAA-3'                                 |
| 4SA for               | 5'-GCTTCAAGAGCCATTAGAGCAAGGATAGCTATGCTGA<br>GGGATGATAATTCA-3' |
| 4SA rev               | 5'-AGCTATCCTTGCTCTAATGGCTCTTGAAGCCTTTGCCGA<br>GTTTCCCG-3'     |
| 3RE for               | 5'-TCTTCAGAATCCATTGAATCAGAGATATCTATGCTGAGG<br>GATGATAATTCA-3' |
| 3RE rev               | 5'-AGATATCTCTGATTCAATGGATTCTGAAGACTTTGCCG<br>AGTTTCCCG-3'     |
| 3RA for               | 5'-TCTTCAGCATCCATTGCATCAGCGATATCTATGCTGAGG<br>GATGATAATTCA-3' |
| 3RA rev               | 5'-AGATATCGCTGATGCAATGGATGCTGAAGACTTTGCC<br>GAGTTTCCCG-3'     |
| SRAA for              | 5'-GCTTCAGCAGCCATTGCAGCAGCGATAGCTATGCTGAGG                    |

GATGATAATTCA-3'

**SRAA rev** 5'-AGCTATCGCTGCTGCAATGGCTGCTGAAGCCTTTGCC  
GAGTTTCCCG-3'

**SRAE for** 5'-GCTTCAGAAGCCATTGAAGCAGAGATAGCTATGCTGAGG  
GATGATAATTCA-3'

**SRAE rev** 5'-AGCTATCTCTGCTTCAATGGCTTCTGAAGCCTTTGCCGA  
GTTTCCCG-3'

**S27A for** 5'-AACTCGGCAAAGgCTTCAAGATCCATTAGATCAAGG-3'

**S27A rev** 5'-TGGATCTTGAAGcCTTTGCCGAGTTTCCCG-3'

**S30A for** 5'-AAGTCTTCAAGAgCCATTAGATCAAGGATATCTATGCT-3'

**S30A rev** 5'-TTGATCTAATGGcTCTTGAAGACTTTGCCGAGTT-3'

**S33A for** 5'-AGATCCATTAGAgCAAGGATATCTATGCTGAGGGA-3'

**S33A rev** 5'-TAGATATCCTTgCCTAATGGATCTTGAAGACTTTGC-3'

**S36A for** 5'-AGATCAAGGATAgCTATGCTGAGGGATGATAATTCA-3'

**S36A rev** 5'-CCCTCAGCATAgcTATCCTTGATCTAATGGATCTTGAA-3'

**R29A for** 5'-GCAAAGTCTTCAgcATCCATTAGATCAAGGATATCTATGC-3'

**R29A rev** 5'-GATCTAATGGATgcTGAAGACTTTGCCGAGTTTC-3'

**R32A for** 5'-TCAAGATCCATTgcATCAAGGATATCTATGCTGAGGG-3'

**R32A rev** 5'-GATATCCTTGATgcAATGGATCTTGAAGACTTTGCC-3'

**R34A for** 5'-TCCATTAGATCAgcGATATCTATGCTGAGGGATGATAAT-3'

**R34A rev** 5'-AGCATAGATATCgcTGATCTAATGGATCTTGAAGACTT-3'

#### DhMPK1 cloning

**DHMPK11\_full f** 5'-CGGGATCCAATATGTAGTCAAAGAGTGCG-3'

**DHMPK11\_full R** 5'-CCGCTCGAGGCTAGTAATTGATTTGTCGC-3'

**DhMPK1\_flankingF** 5'-CGTATTGAAGCAATGGCTAG-3'

#### PPZ1 cloning

**Scppz1 Full F** 5'-AAATGCATGCGTCCTCCAATTCAACAAACTA-3'

**Scppz1 orf R** 5'-AAGGTACCTTACTGTTGAGATTTCGTTATCA-3'

**Scppz1 del F** 5'-AAATCAAATAAATCGTCCACTACGAATACTAATTC-3'

**Scppz1del R** 5'-TCGTAGTGGACGATTTATTTGATTTTGCAGACTTC-3'

#### RT-PCR Primers

**DHTRK1\_RTF** 5'-TCAGAGGGAGGCACAGAGGTTTG-3'

**DHTRK1\_RTR** 5'-GCATTCCCATCATCCAAGCTATTTG-3'

**DHENA1\_RTF** 5'-TTTCCCAGTCGTCTACATTCCTGTAATC-3'

**DHENA1\_RTR** 5'-TGGATCATTCTTCTCTAAGTCGTAATCTGG-3'

**DHNHA1\_RTF** 5'-GTGGATCTGAAGAGACTGATGAGGATG-3'

**DHNHA1\_RTR** 5'-TCATCTTCTTTCCGCTATGAGTTGGC-3'

**Dh\_GPD F** 5'-TTGTCTCCACCGATTTCTTAG-3'

**Dh\_GPD R** 5'-CAAGTCGACAACCTCTGGTAGAG-3'

#### Two hybrid cloning

**DhHAL3 ORFf** 5'-GGAATTCCATATGGTTTCAGAAAATGGTG-3'

**DhHAL3 ORFr** 5'-CCGCTCGAGTTAAGTGTTATTAGATTCTTCCTC-3'

**DhPPZ1 2HF** 5'-ATCGGATCCATATGGGGAACAATTCATCTAAG-3'

**DhPPZ1\_ORF R** 5'-CCGCTCGAGTTACAGCTGTTGCAACTGAG-3'

---



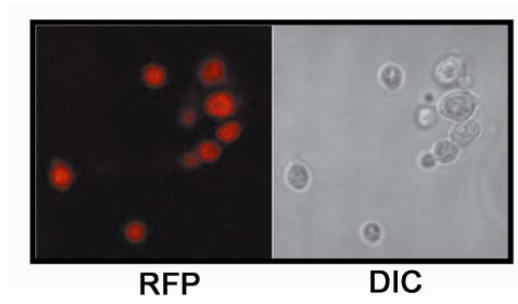

**Figure S2. Localization of the DhPpz1p-RFP fusion protein.** *D. hansenii* strain DBH93 harboring plasmid pAN4 (DhPPZ1-RFP) at logarithmic phase was observed under fluorescence microscope. RFP fluorescence is shown in red. Right panel shows the DIC image of the same cells.

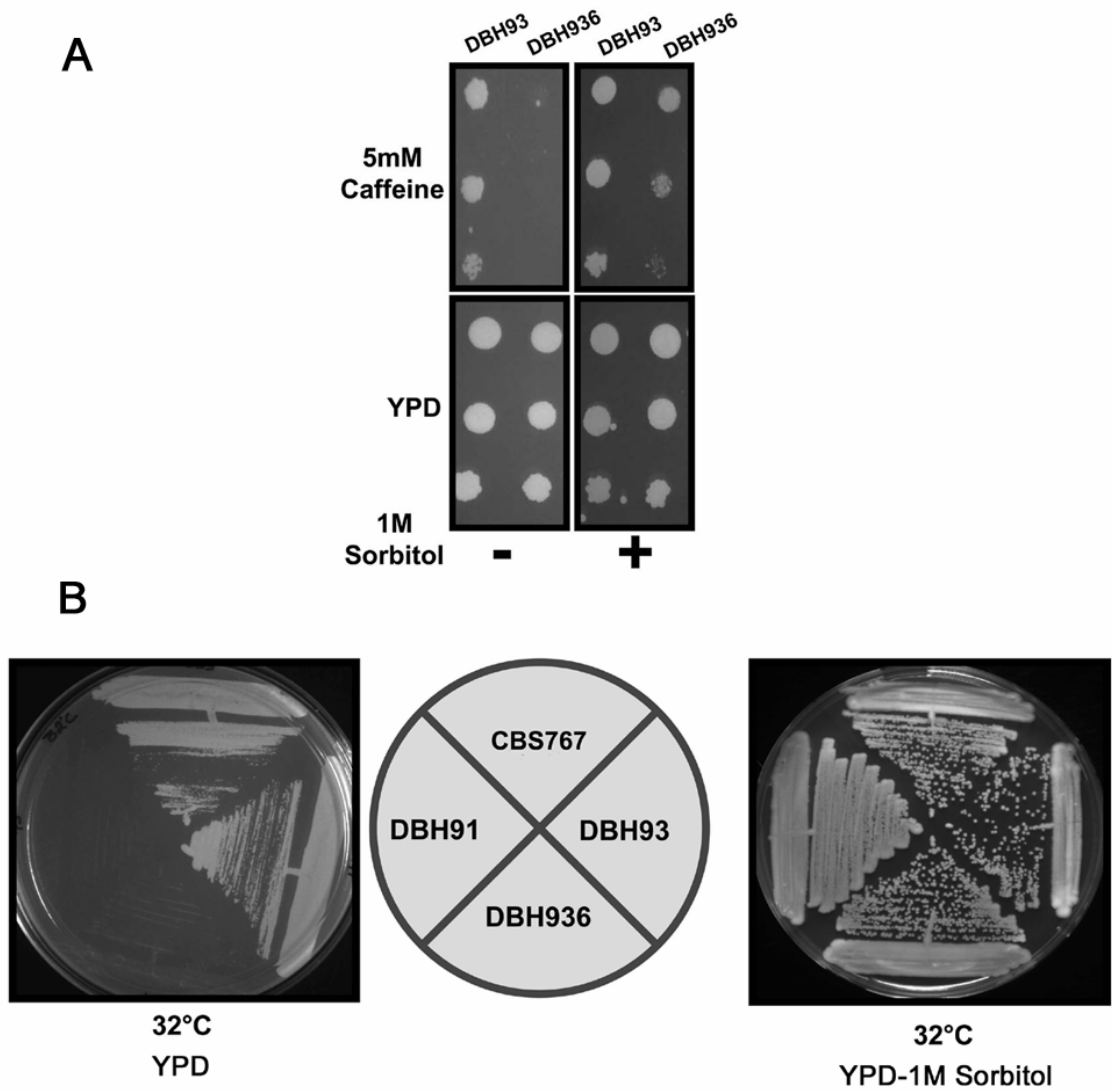

**Figure S3. A. Sensitivity of *dhppz1* mutant towards cell wall destabilizing agent.** Serial dilution of DBH936 (*dhppz1*) and DBH93 (parent) strains on YPD or YPD plus 1M sorbitol with 5mM caffeine incubated four days at 28°C **B.** Temperature-dependent cell lysis defect of *dhppz1* mutants. Growth of *dhppz1* mutants (DBH91 and DBH936) on YPD and YPD plate supplemented with 1M sorbitol at 32°C. CBS767 and DBH93 strains were used as control.

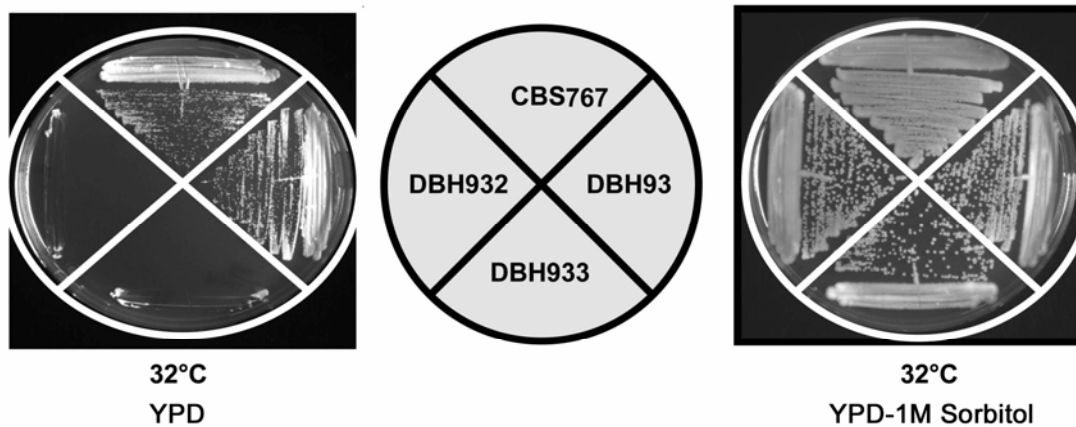

**Figure S4. Temperature-dependent cell lysis defect of *dhmpk1* mutants.** Growth of *dhmpk1* mutants (two independent transformants - DBH932 and DBH933) on YPD and YPD plate supplemented with 1M sorbitol at 32°C. CBS767 and DBH93 strains were used as control.

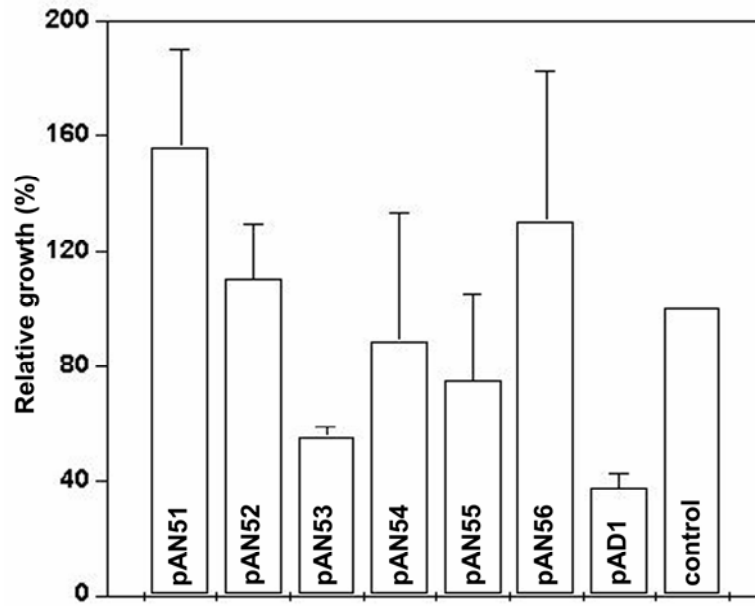

**Figure S5. Effect of different N-terminal deletions on slow growth phenotype of *dhppz1* mutant.** Saturated cultures of *dhppz1* mutant (DBH936) carrying different mutant plasmids pAN51, pAN52, pAN53, pAN54, pAN55, pAN56 or vector pDA1 were used to re-inoculate 25 ml YNB medium at initial OD<sub>600</sub> of 0.025. After 24 hr of growth at 28C, OD<sub>600</sub> of each culture was measured and expressed as relative growth as percentage of control strain (100%). DBH93 harboring plasmids pDA1 and pDH4 was used as control. Data presented as mean ± sd of three independent experiments.
